# Supplementary material for: Synthesis, In Silico and In Vitro Assessment of New Quinazolinones as Anticancer Agents via Potential AKT Inhibition
Source: PubMed Central journal article supplement (PMC7594071; doi:10.3390/molecules25204780), 2020-10-18
Supplement: molecules-25-04780-s001.pdf [file molecules-25-04780-s001.pdf]

## Supplementary Materials

# Synthesis, *in silico* and *in vitro* assessment of new quinazolinones as anticancer agents via potential AKT inhibition

Ahmed A. Noser<sup>1</sup>, Mohamed El-Naggar<sup>2</sup>, Thoria Donia<sup>3</sup> and Aboubakr H. Abdelmonsef<sup>4\*</sup>

<sup>1</sup> Organic Chemistry, Chemistry Department, Faculty of Science, Tanta University, Tanta 31527, Egypt

<sup>2</sup> Chemistry Department, Faculty of Sciences, University of Sharjah, 27272 Sharjah, UAE

<sup>3</sup> Biochemistry Division, Chemistry Department, Faculty of Science, Tanta University, Tanta 31527, Egypt

<sup>4</sup> Chemistry Department, Faculty of Science, South Valley University, Qena 83523, Egypt

\* Correspondence: aboubakr.ahmed@sci.svu.edu.eg

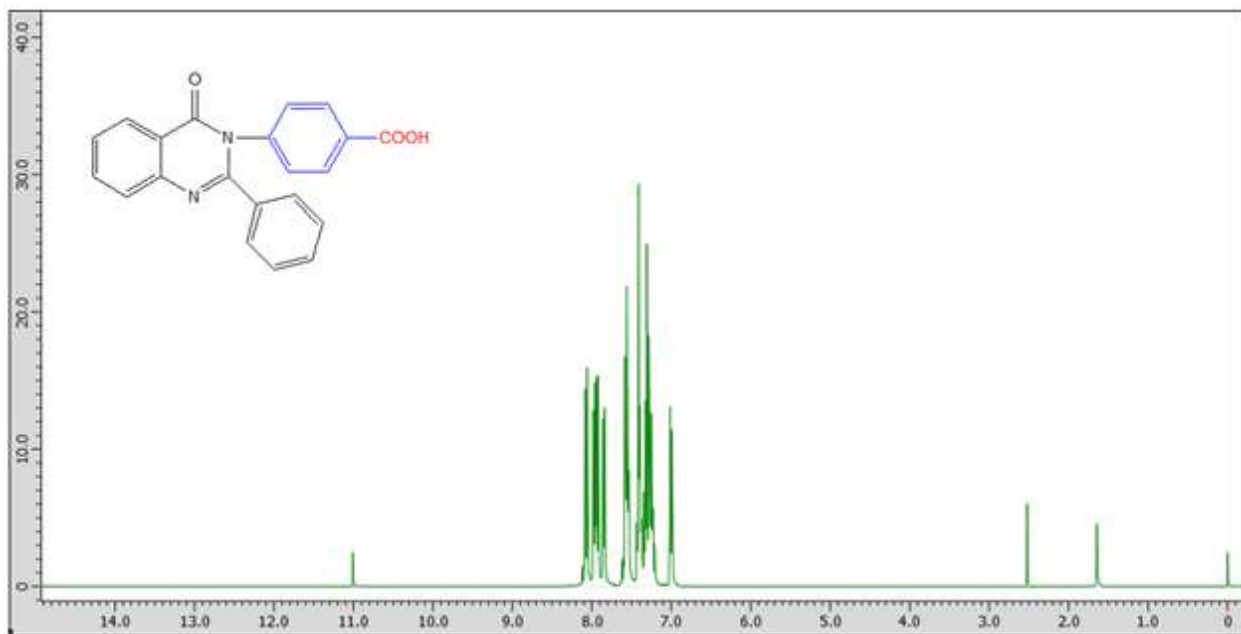

<sup>1</sup>H-NMR spectrum of compound 2.

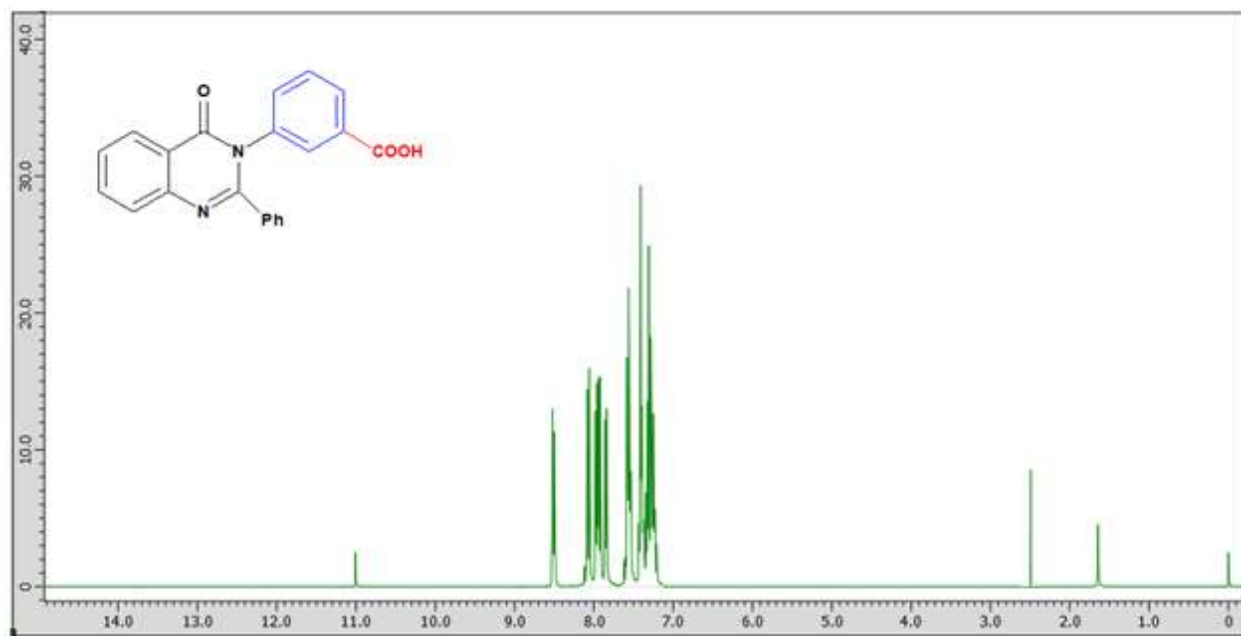

<sup>1</sup>H-NMR spectrum of compound 3.

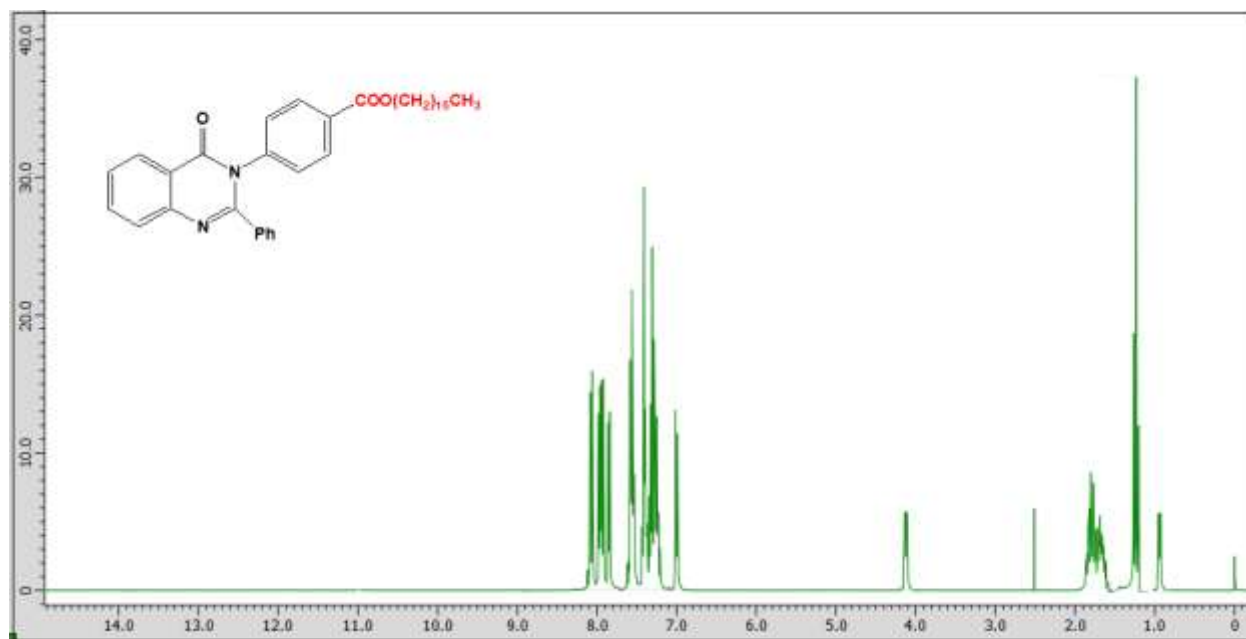

<sup>1</sup>H-NMR spectrum of compound 4.

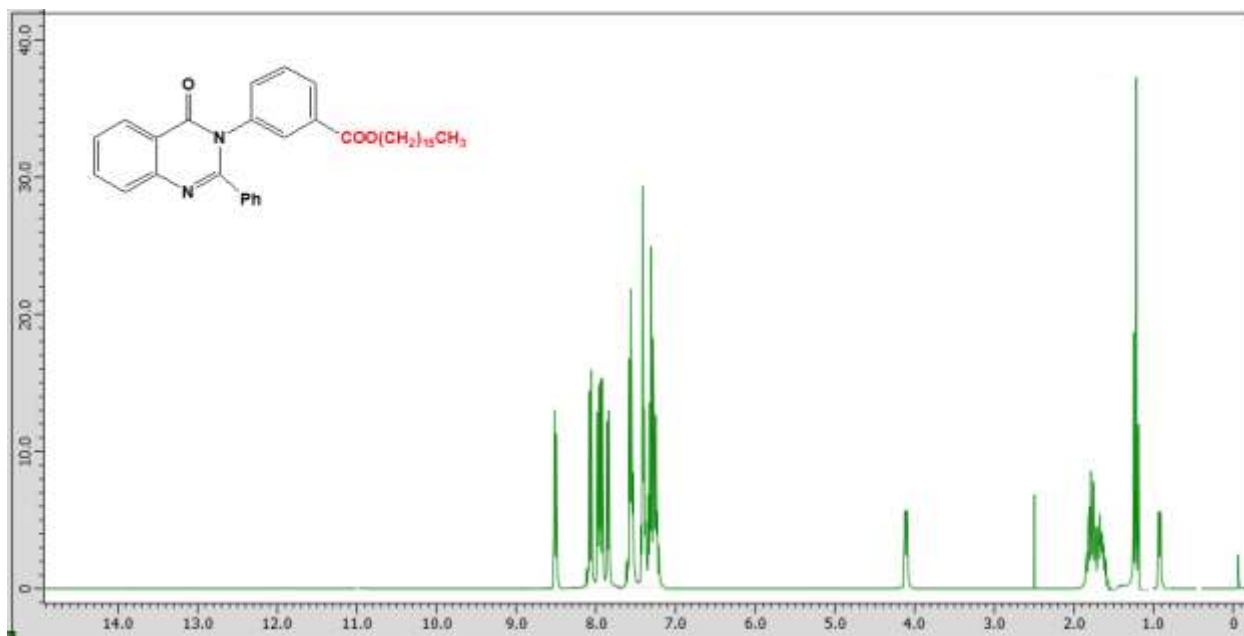

<sup>1</sup>H-NMR spectrum of compound 5.

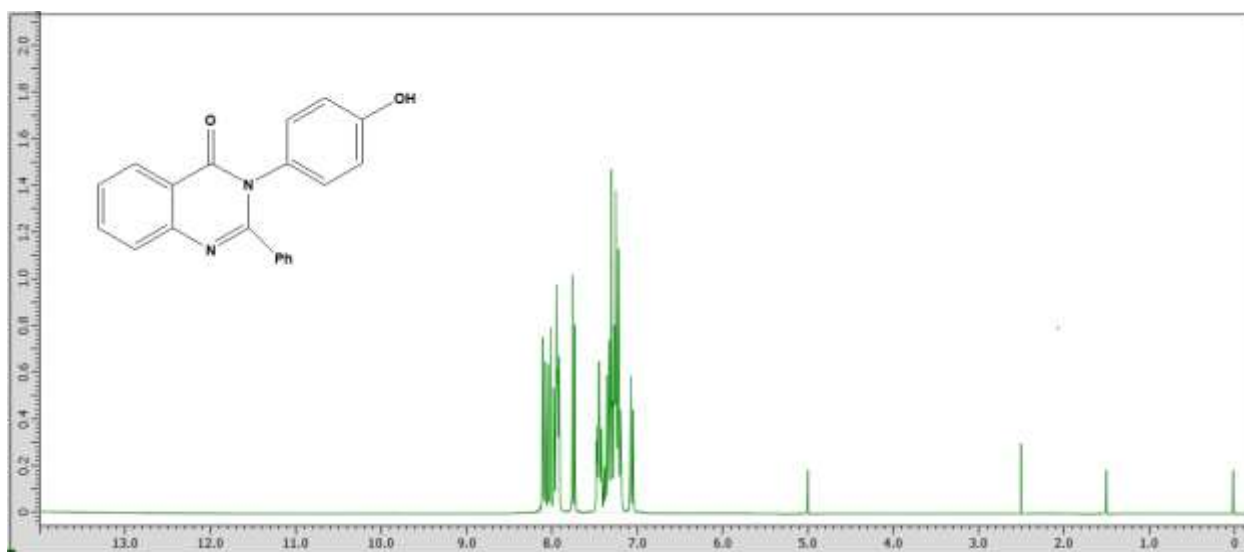

<sup>1</sup>H-NMR spectrum of compound 6.

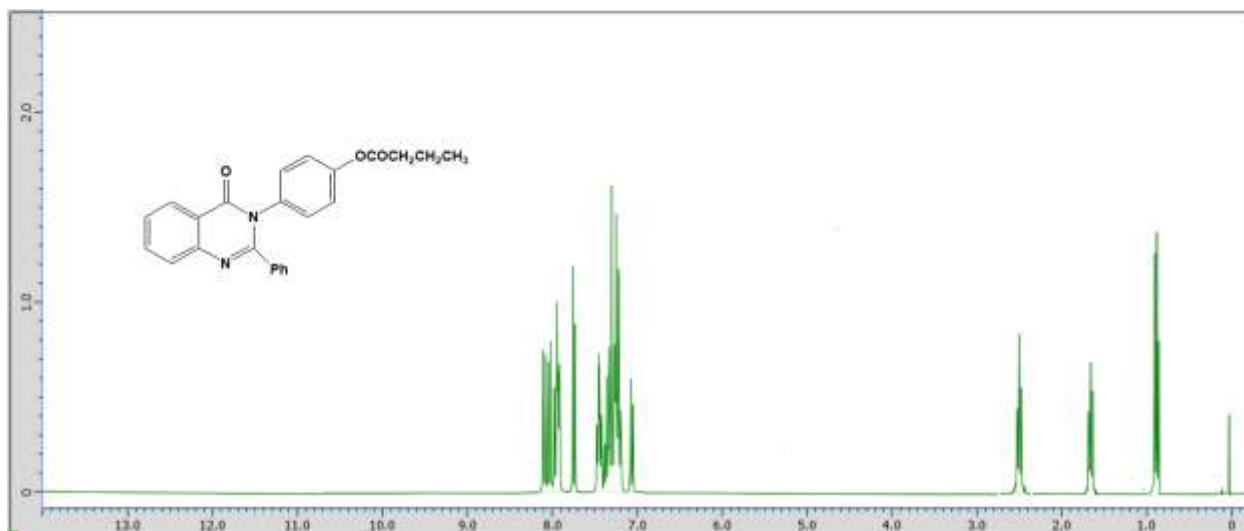

$^1\text{H-NMR}$  spectrum of compound 7.

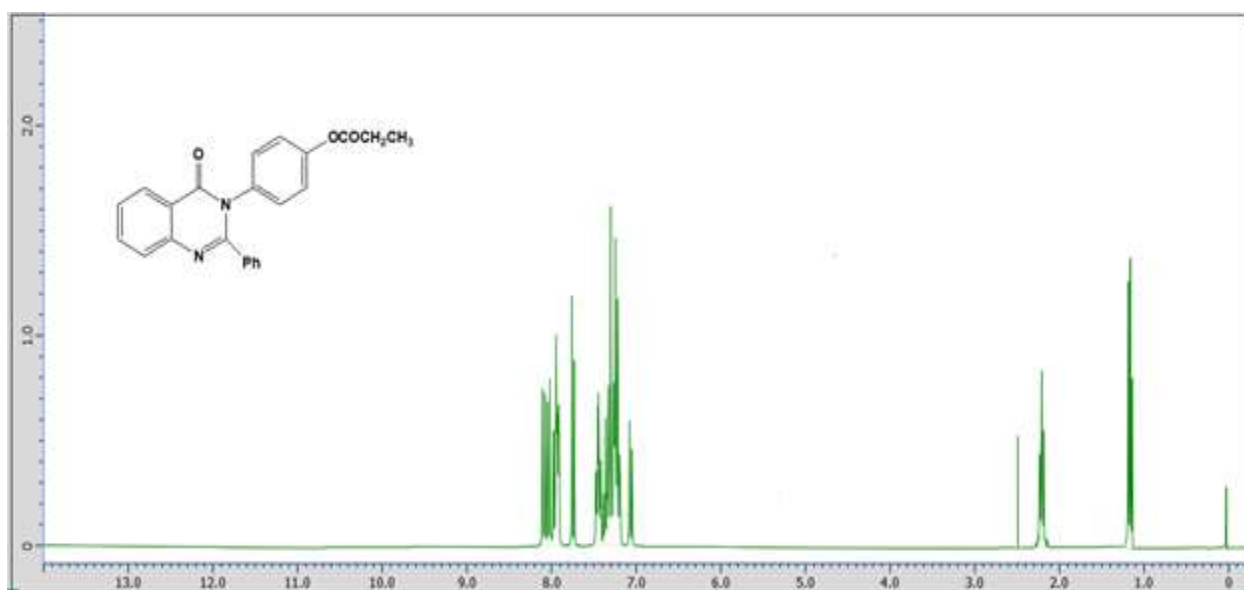

$^1\text{H-NMR}$  spectrum of compound 8.

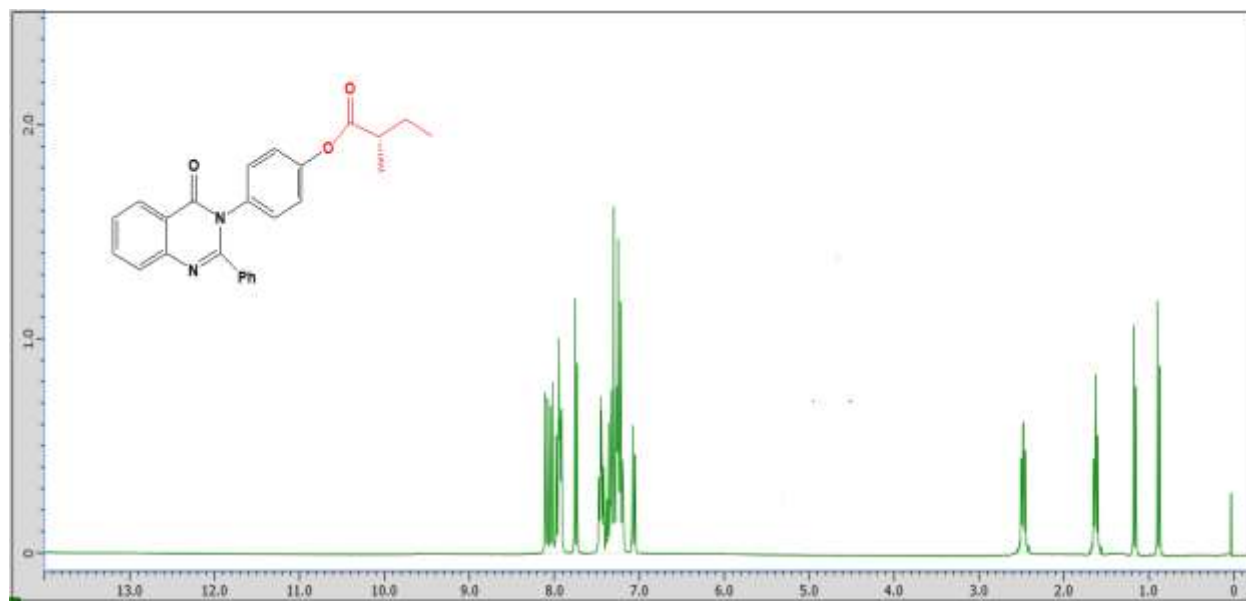

$^1\text{H-NMR}$  spectrum of compound 10.

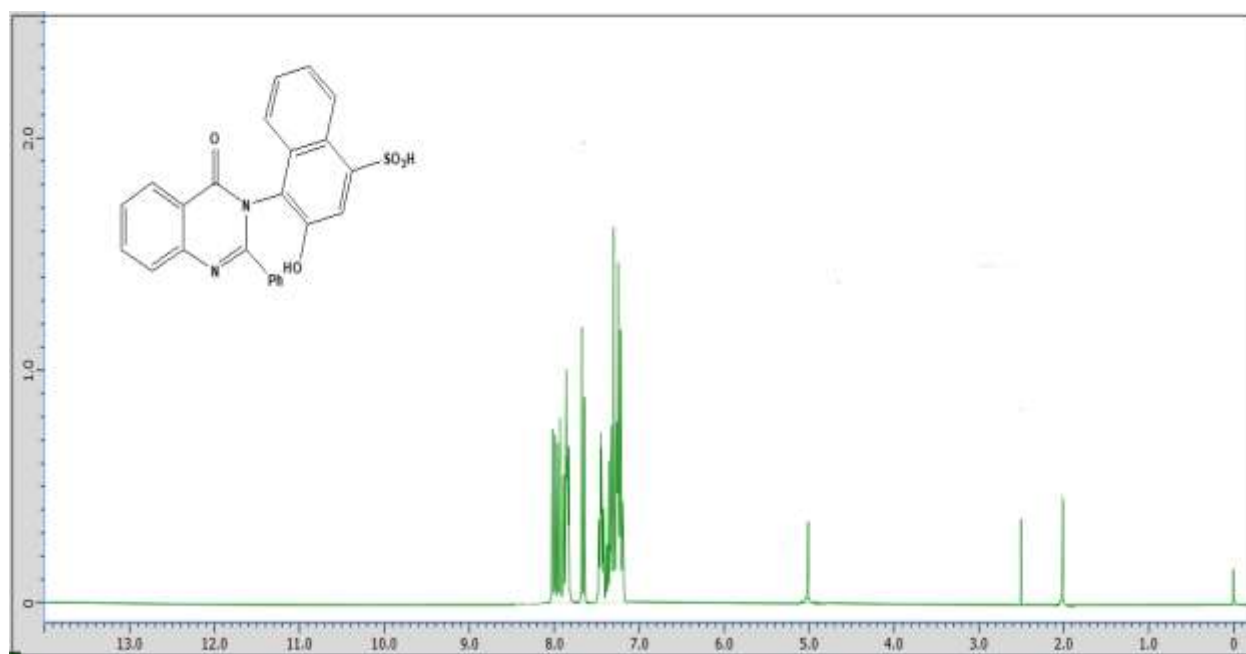

$^1\text{H-NMR}$  spectrum of compound 11.

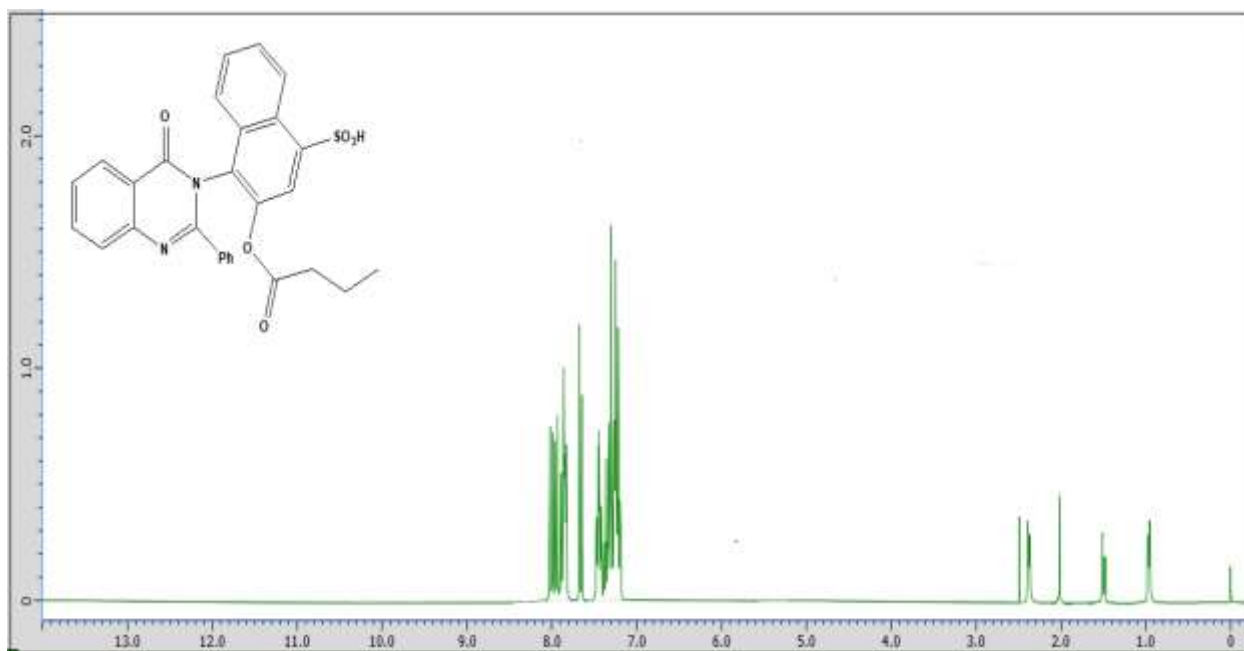

$^1\text{H-NMR}$  spectrum of compound 12.

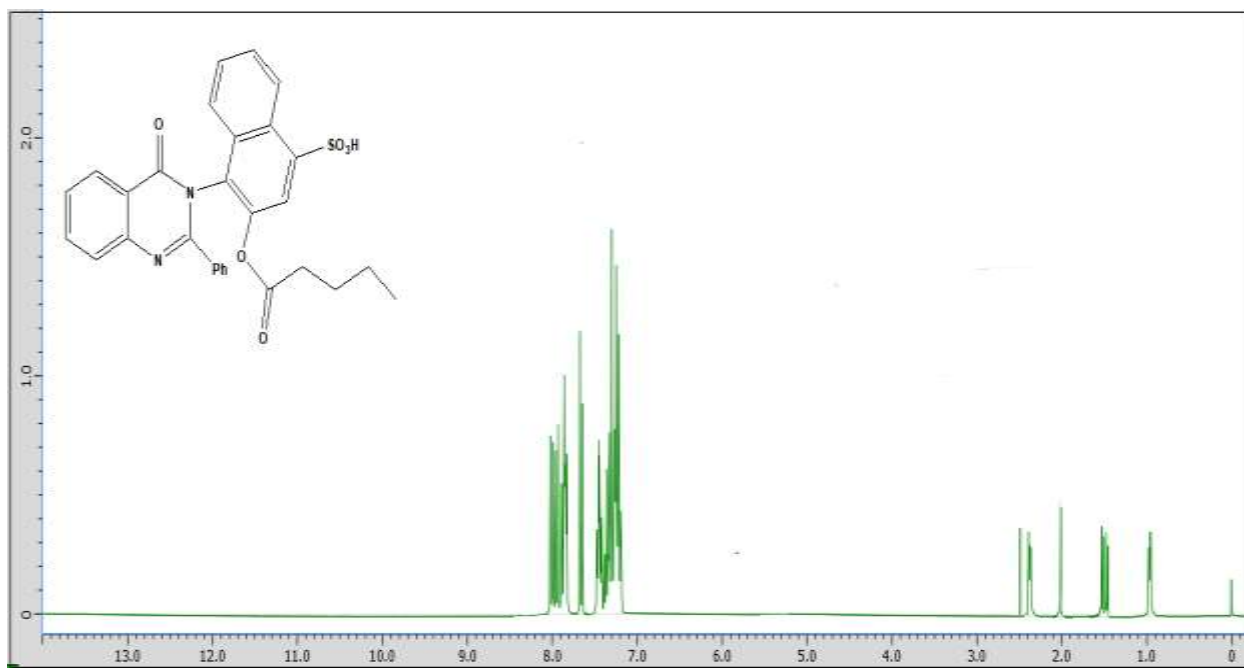

$^1\text{H-NMR}$  spectrum of compound 13.

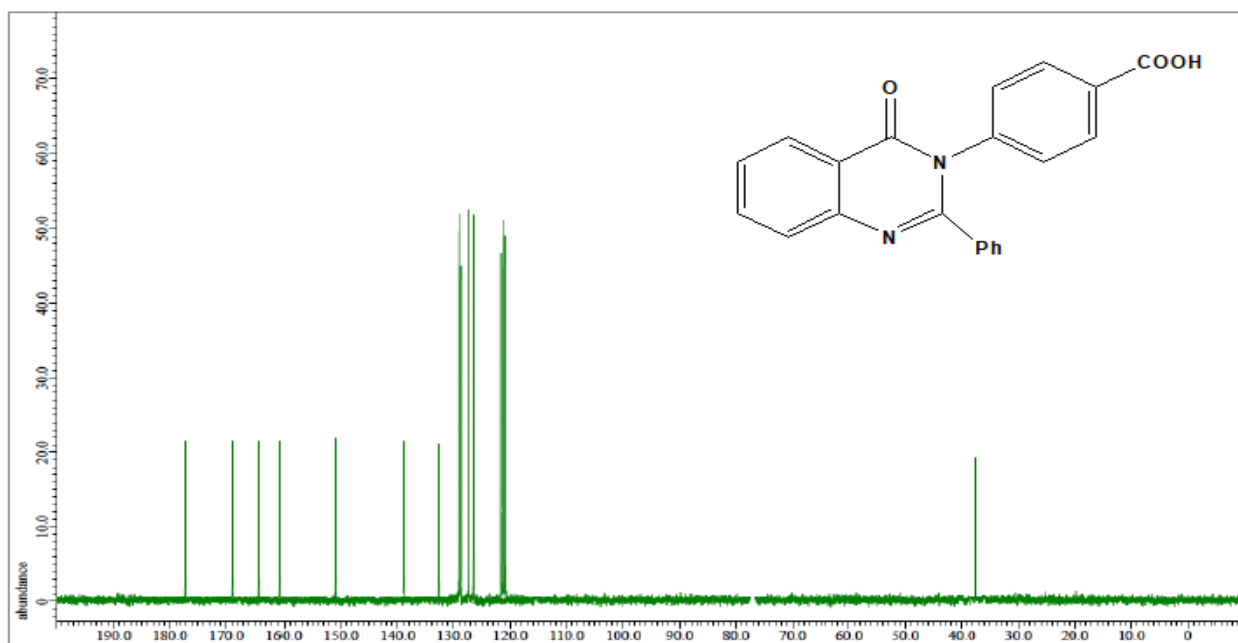

$^{13}\text{C}$ -NMR spectrum of compound 2.

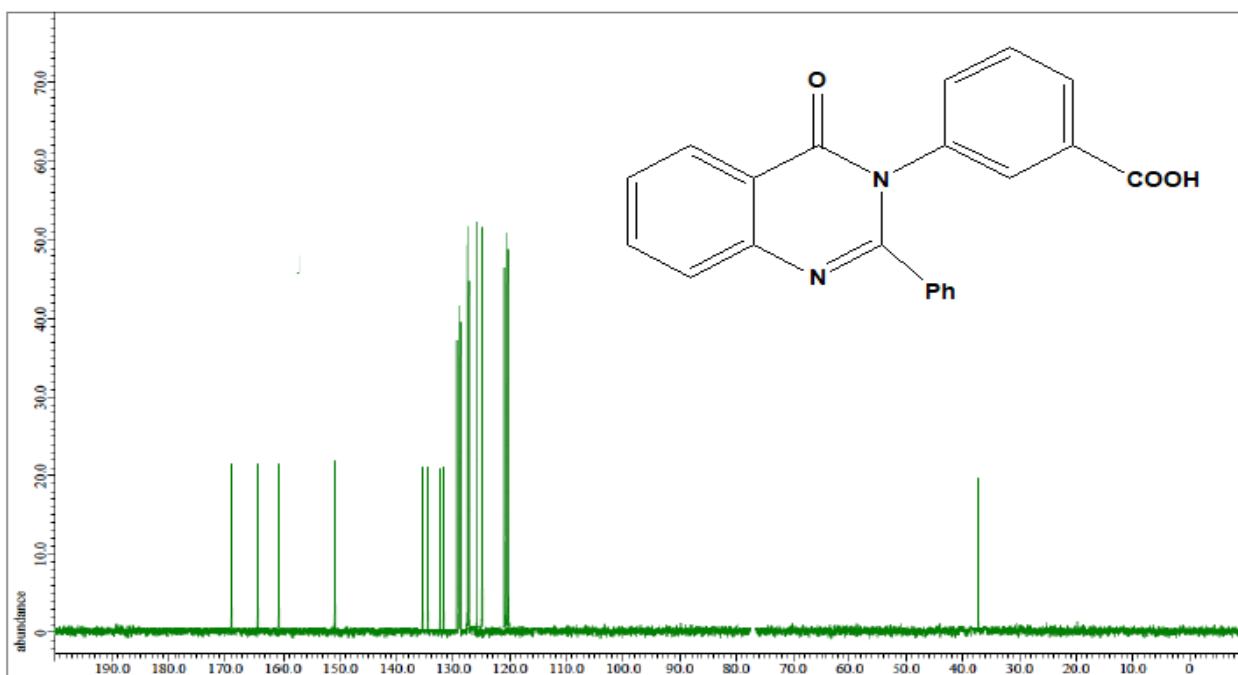

$^{13}\text{C}$ -NMR spectrum of compound 3.

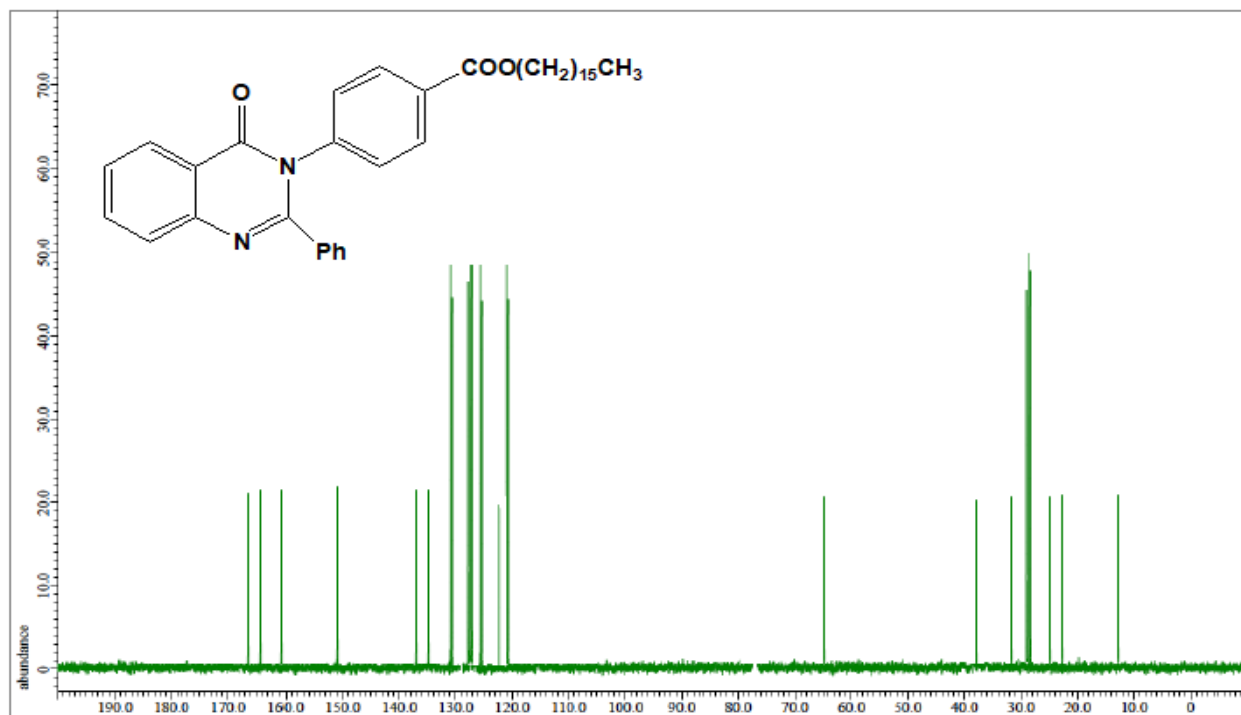

<sup>13</sup>C-NMR spectrum of compound 4.

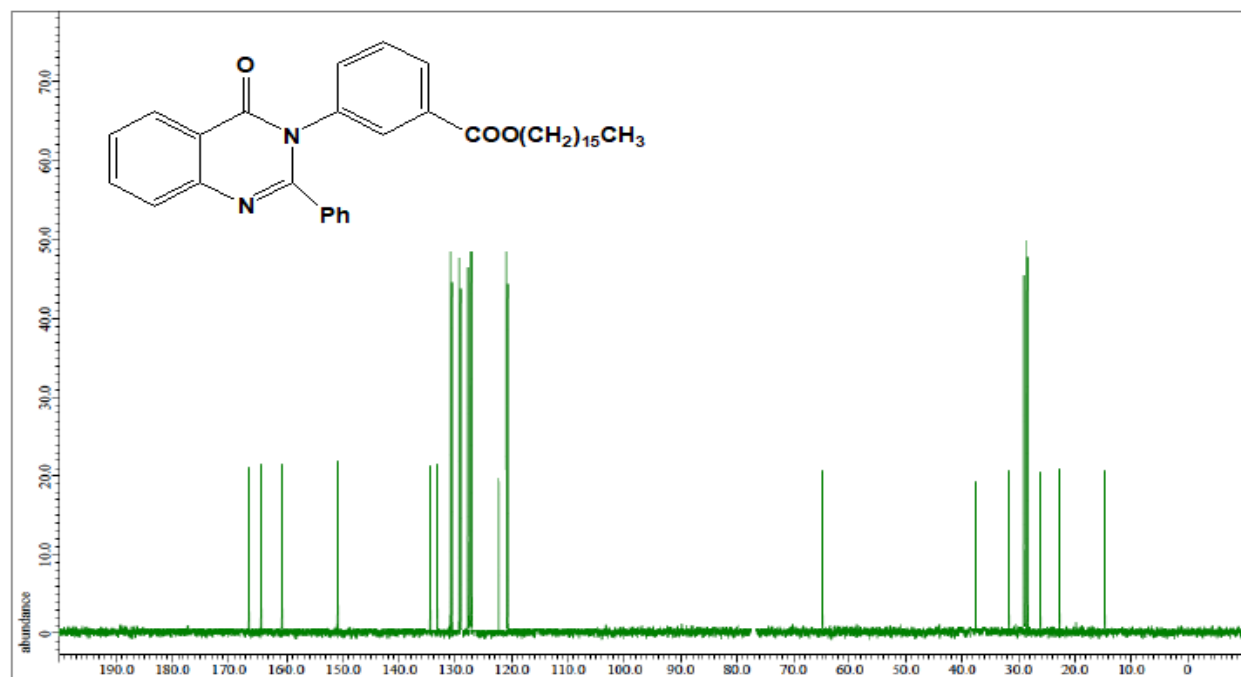

<sup>13</sup>C-NMR spectrum of compound 5.



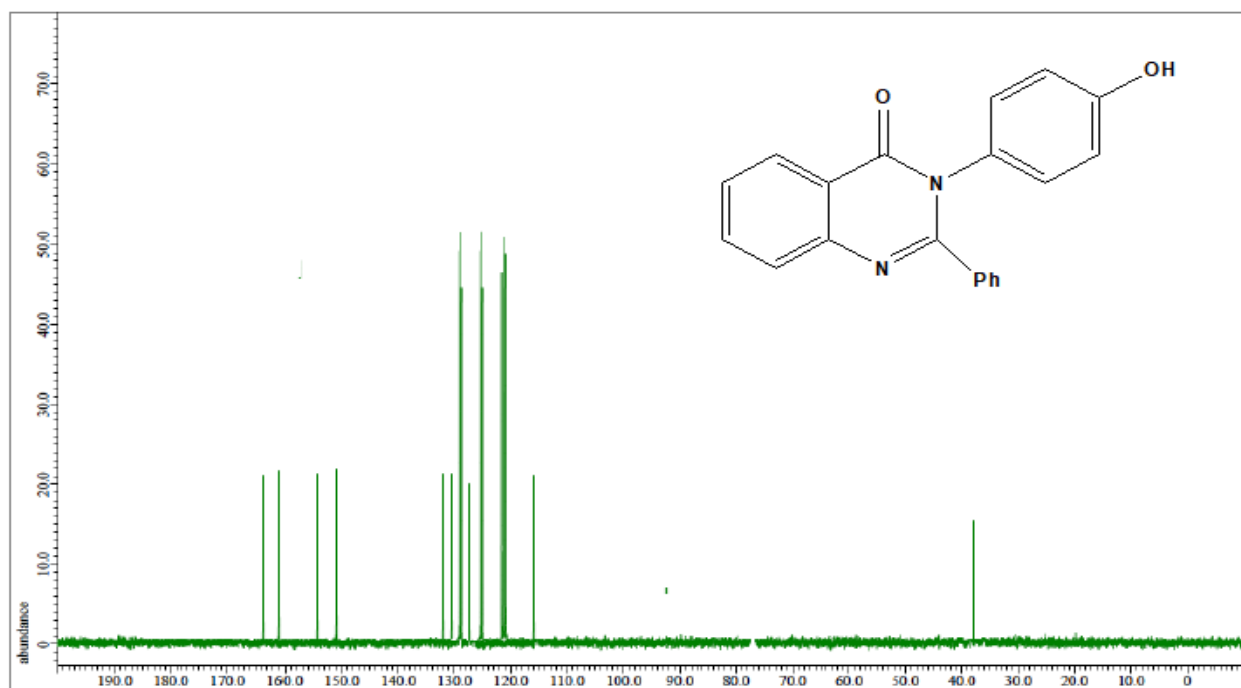

$^{13}\text{C}$ -NMR spectrum of compound 6.

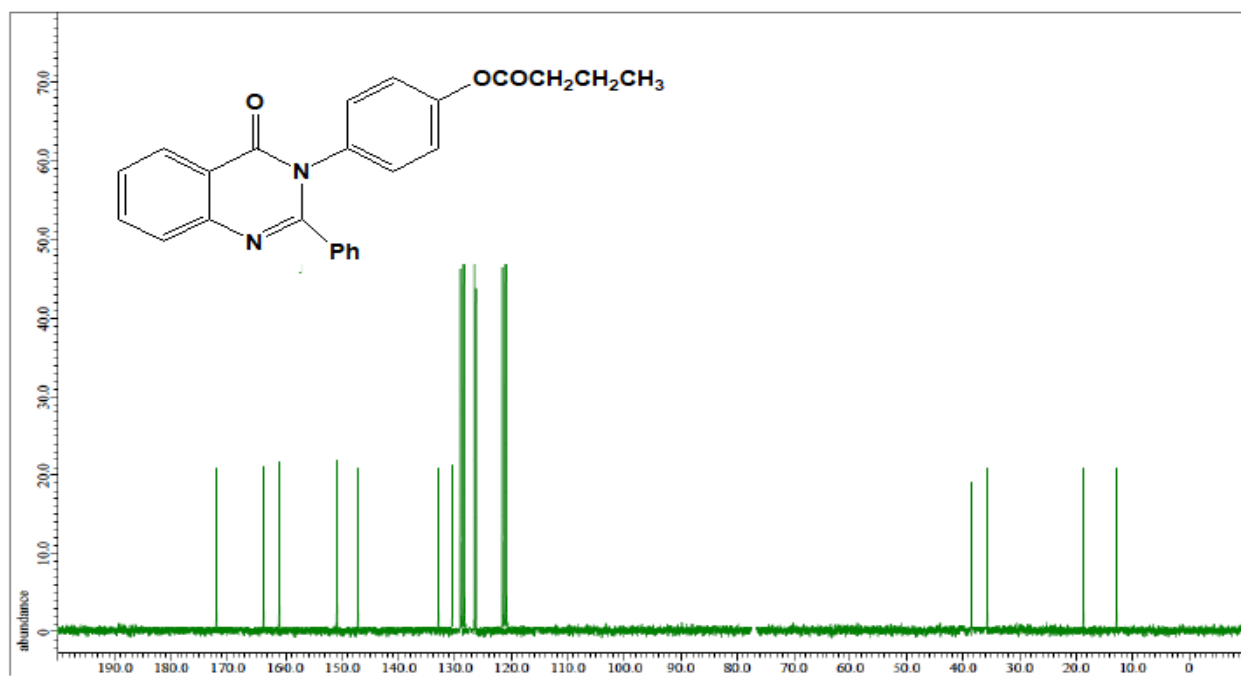

$^{13}\text{C}$ -NMR spectrum of compound 7.

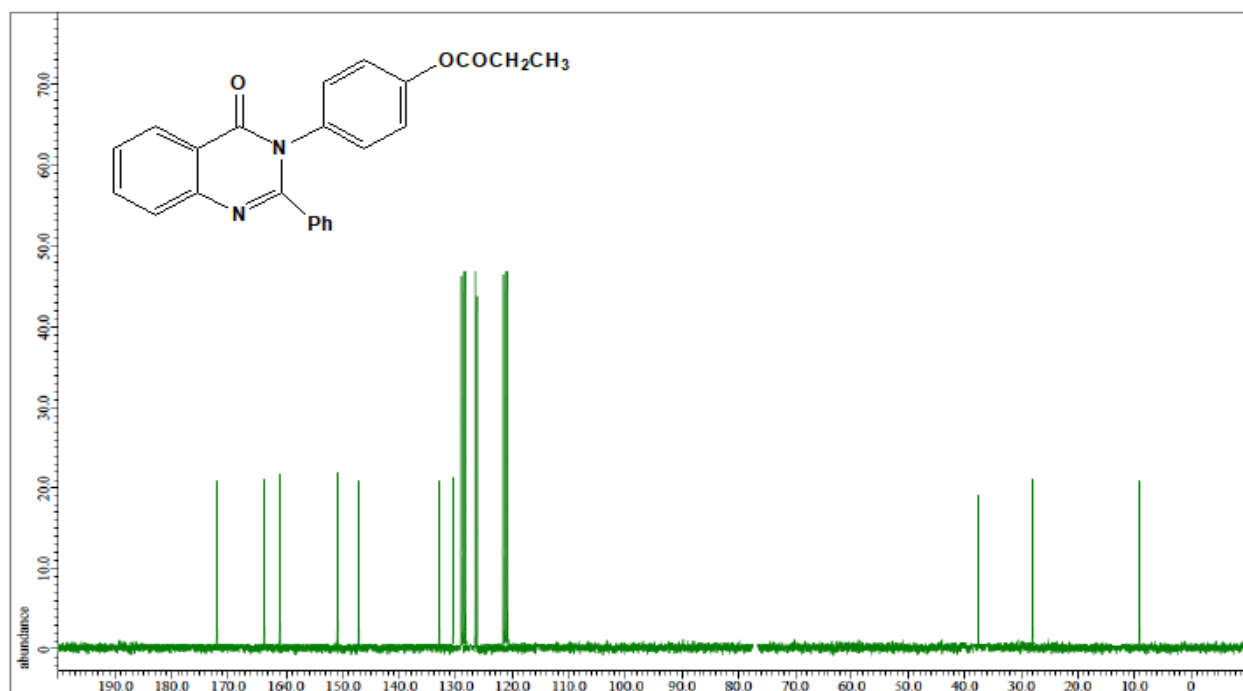

<sup>13</sup>C-NMR spectrum of compound 8.

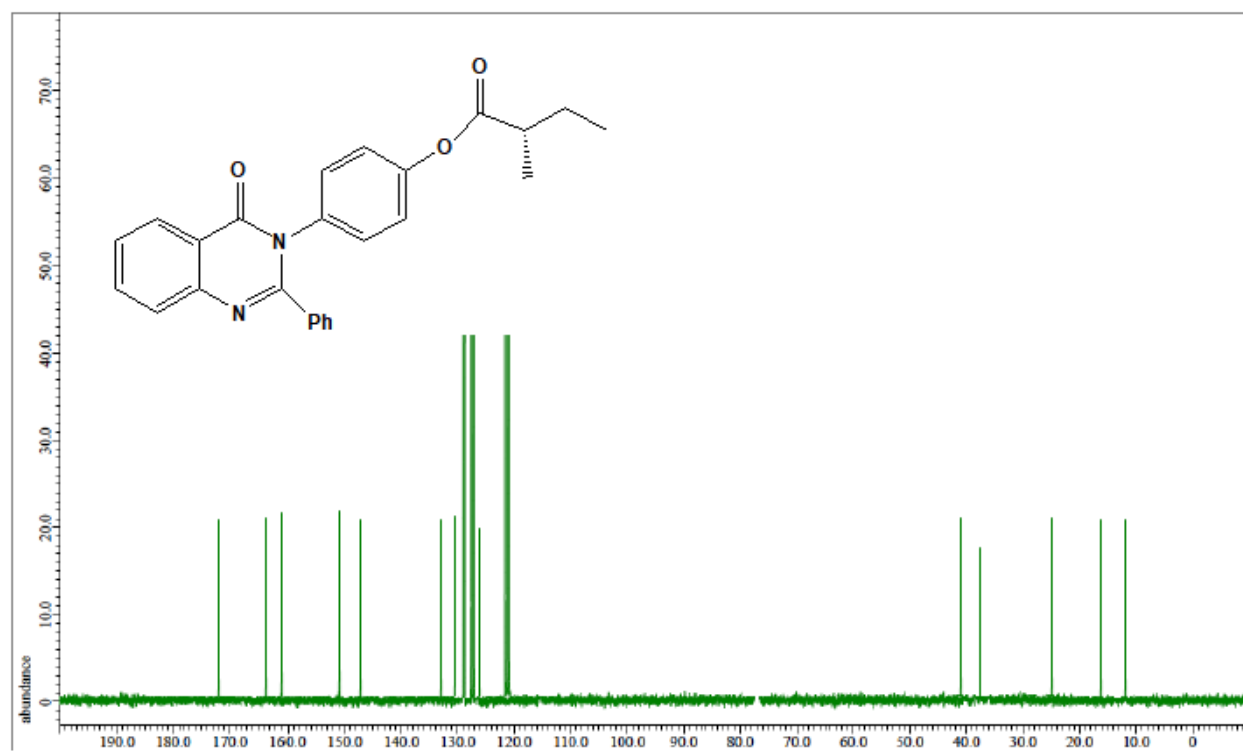

<sup>13</sup>C-NMR spectrum of compound 10.

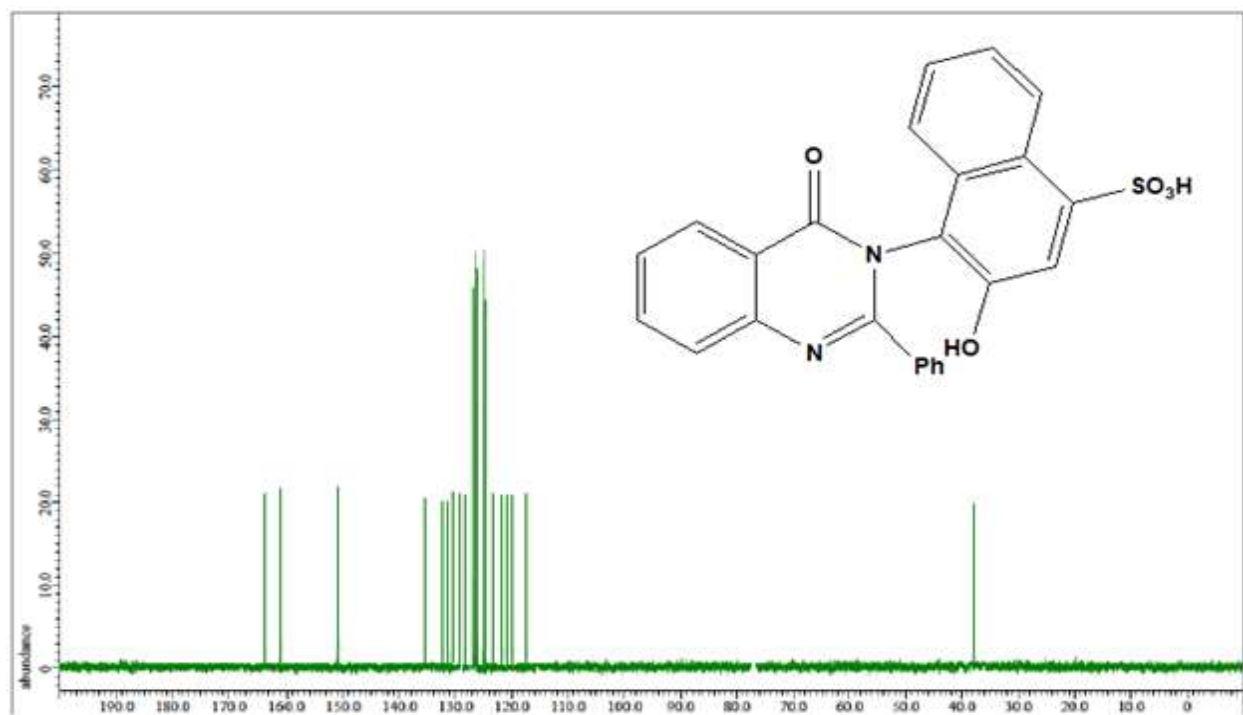

$^{13}\text{C}$ -NMR spectrum of compound 11.

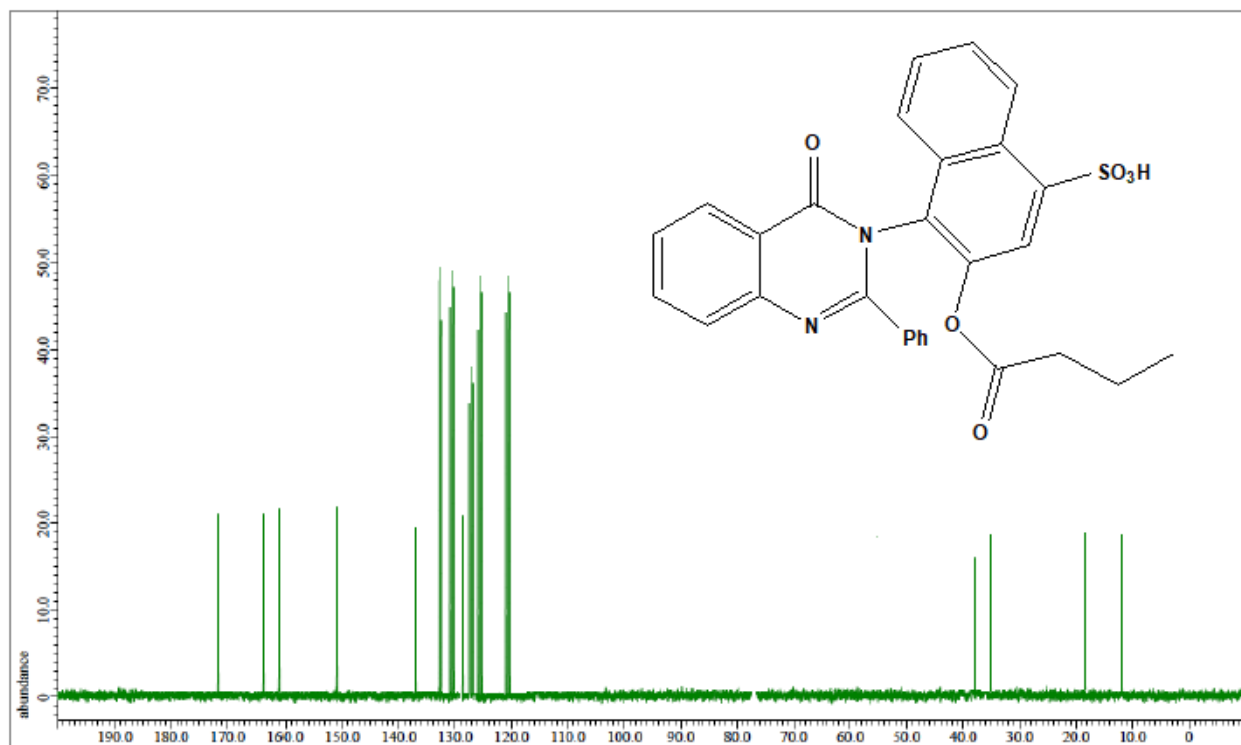

$^{13}\text{C-NMR}$  spectrum of compound 12.

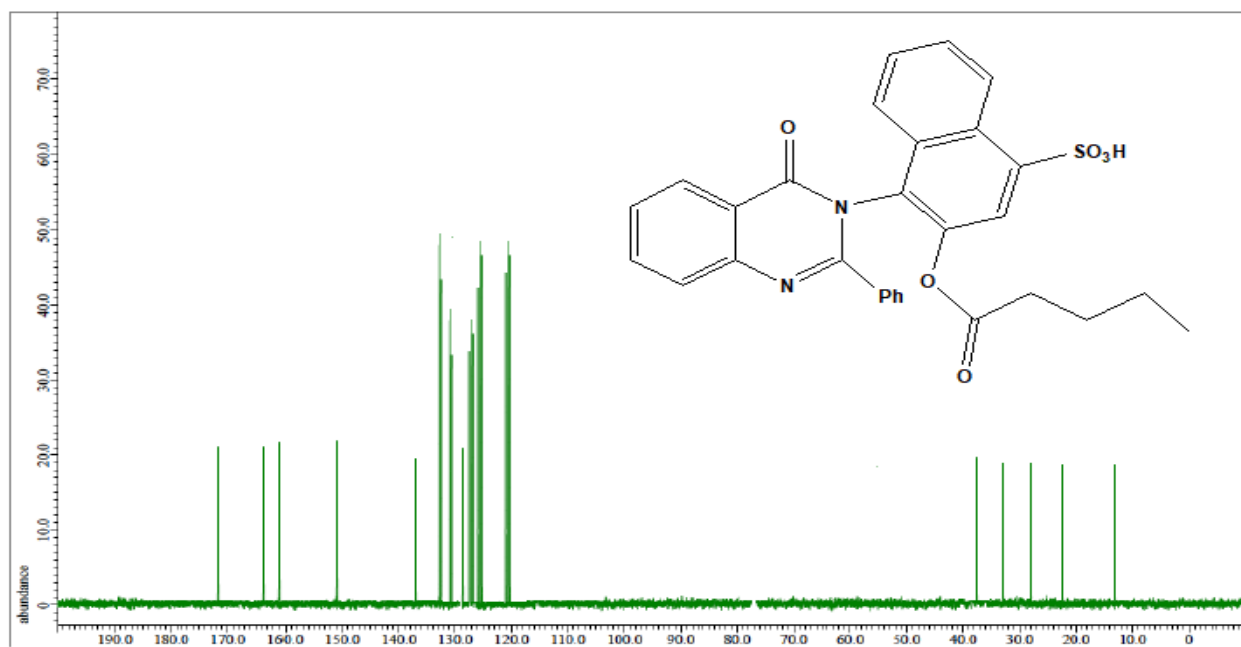

$^{13}\text{C-NMR}$  spectrum of compound 13.

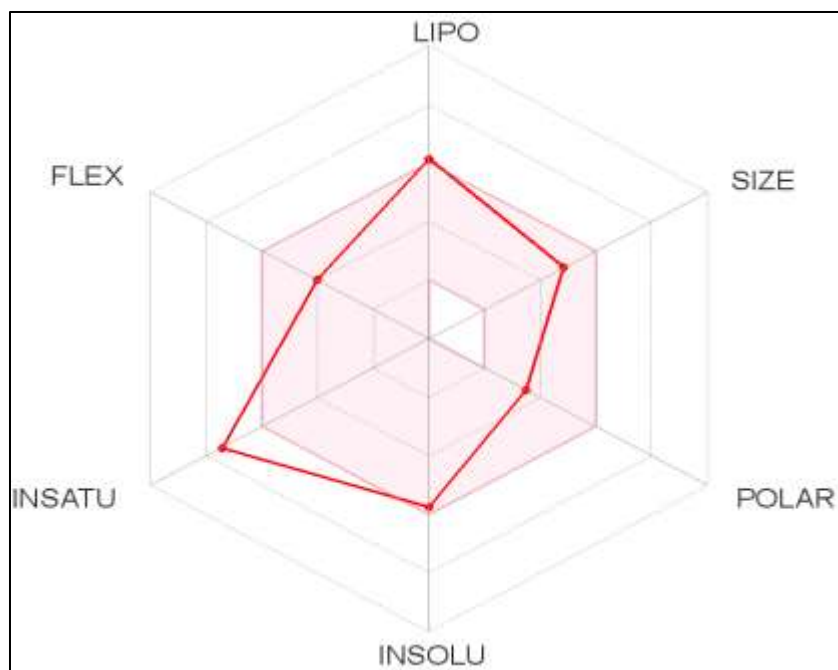

**The oral bioavailability radar of the molecule 9.** The colored zone is the suitable physicochemical space for oral bioavailability.

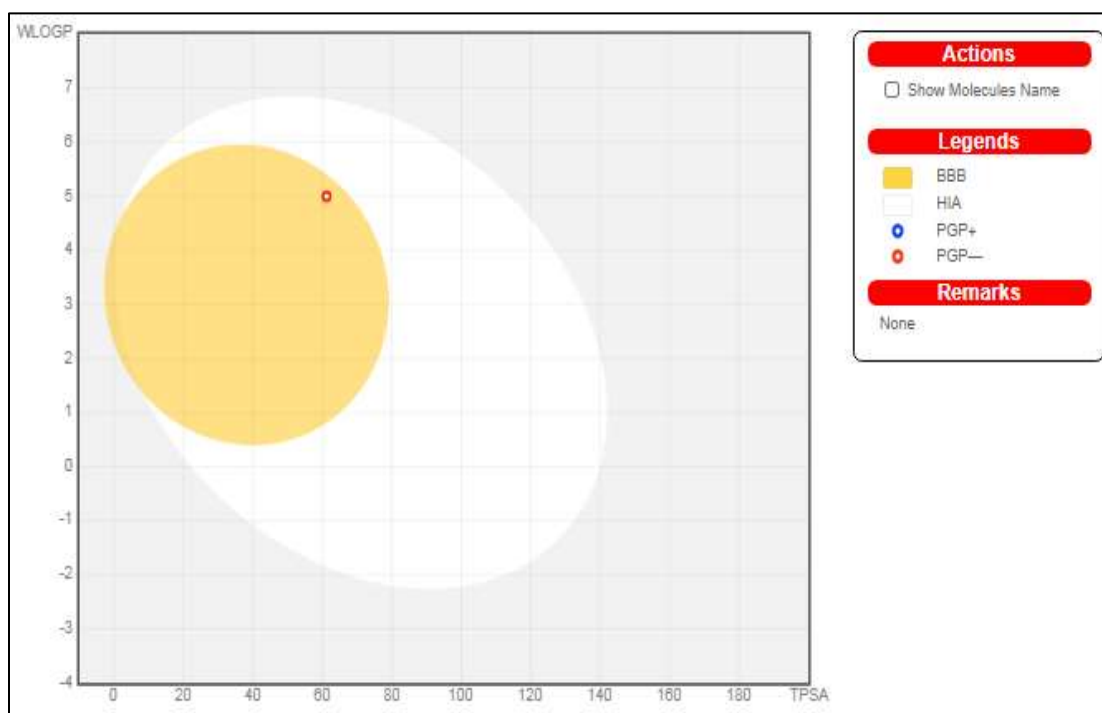

The Boiled-egg plot of the selected compound 9
